# Supplementary figures and images for: Brain Dynamics Altered by Photic Stimulation in Patients with Alzheimer’s Disease and Mild Cognitive Impairment
Source: MDPI journal article supplement (doi:10.3390/e23040427), 2021-04-04

# 9-Hz PS

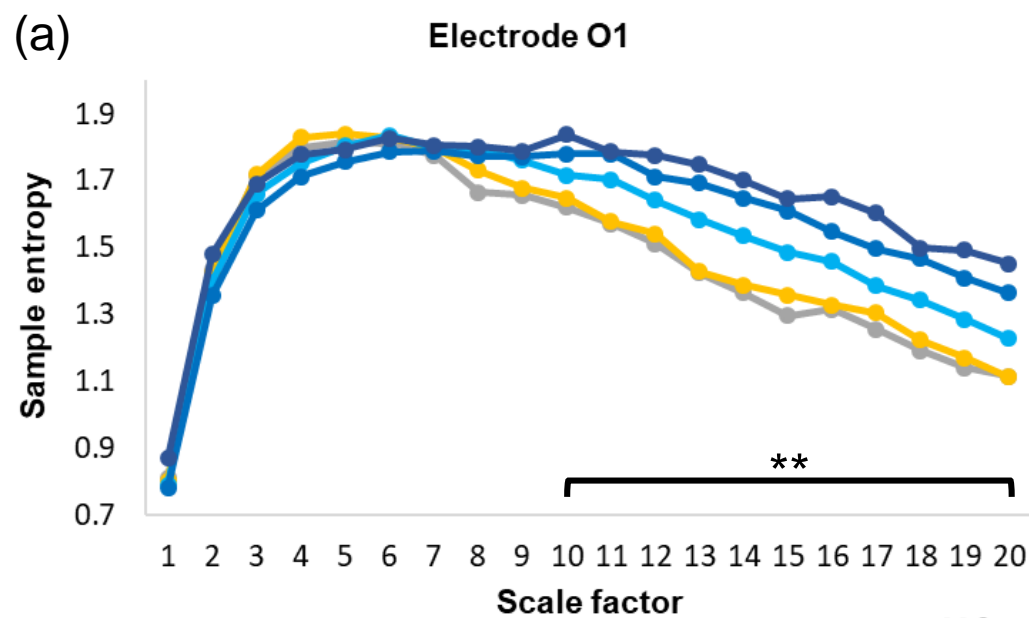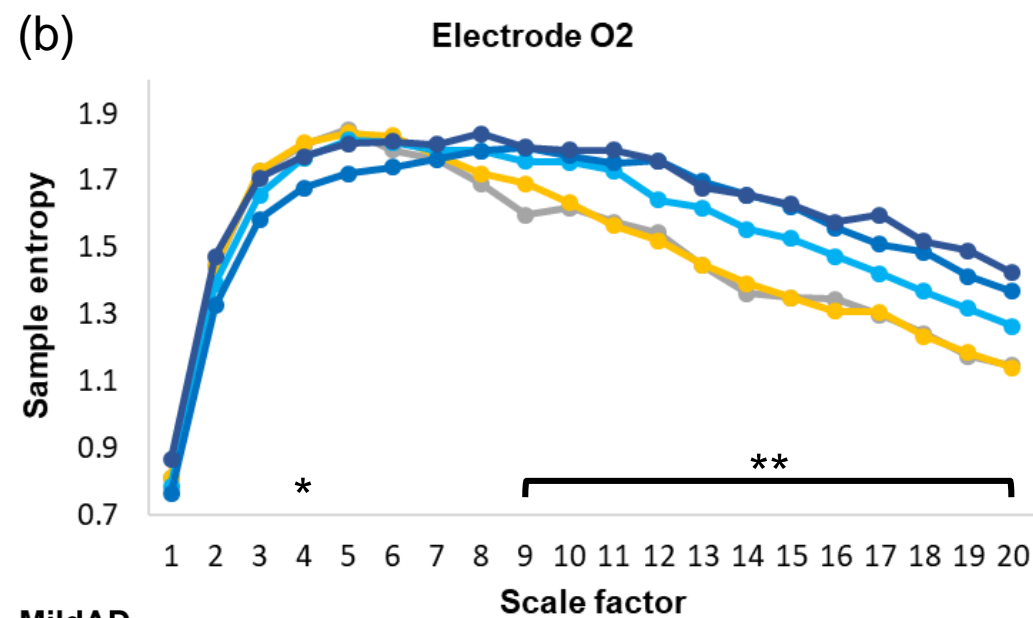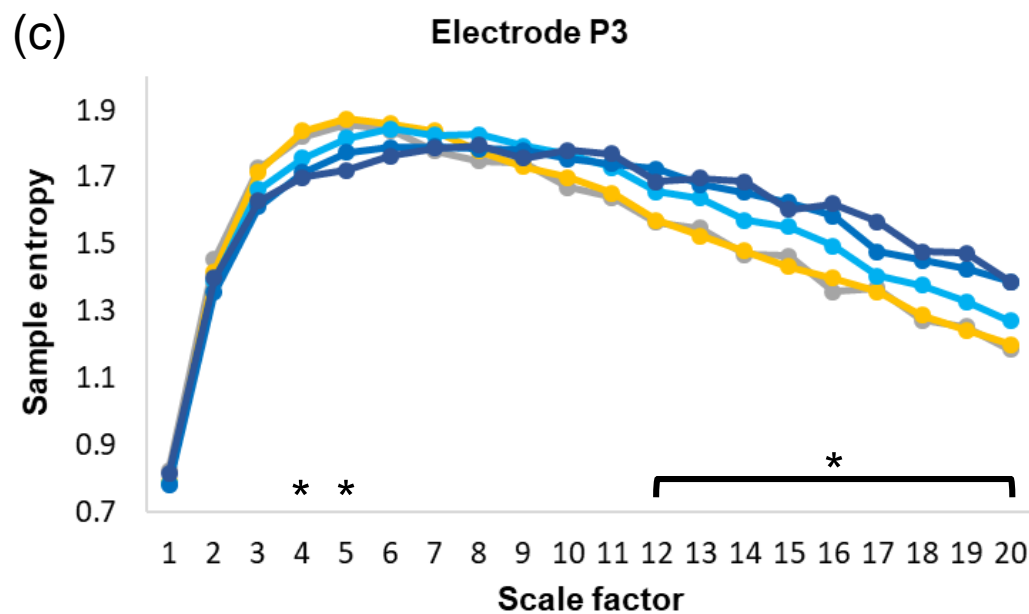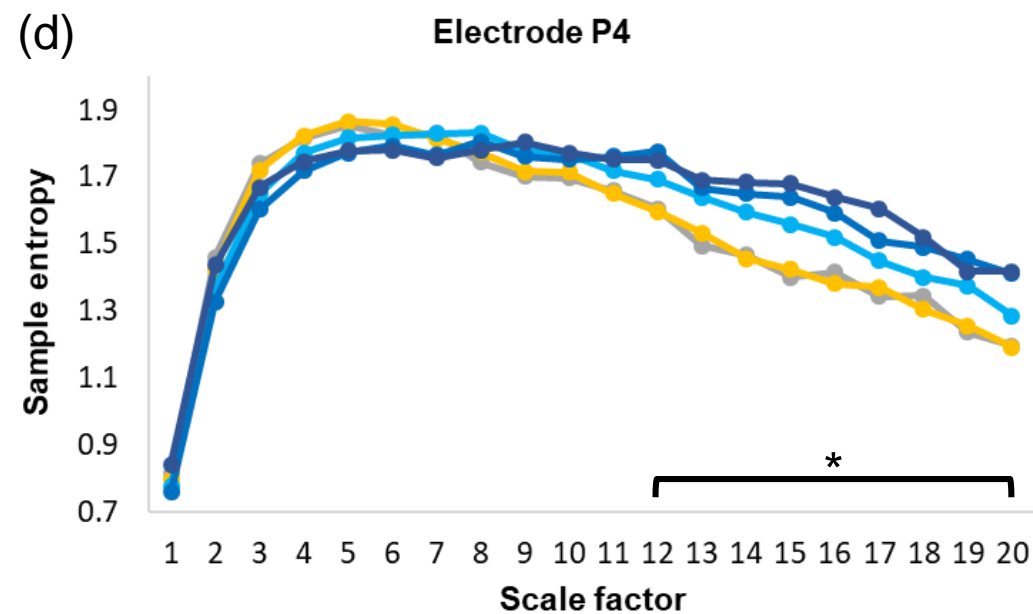

Supplement: s1 [file s1]

# 5-Hz PS

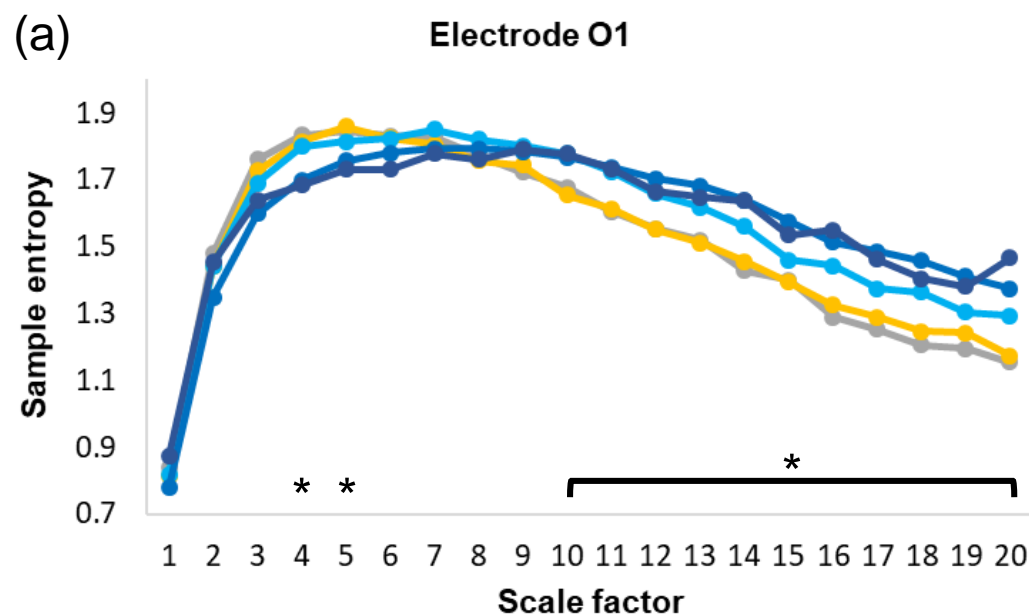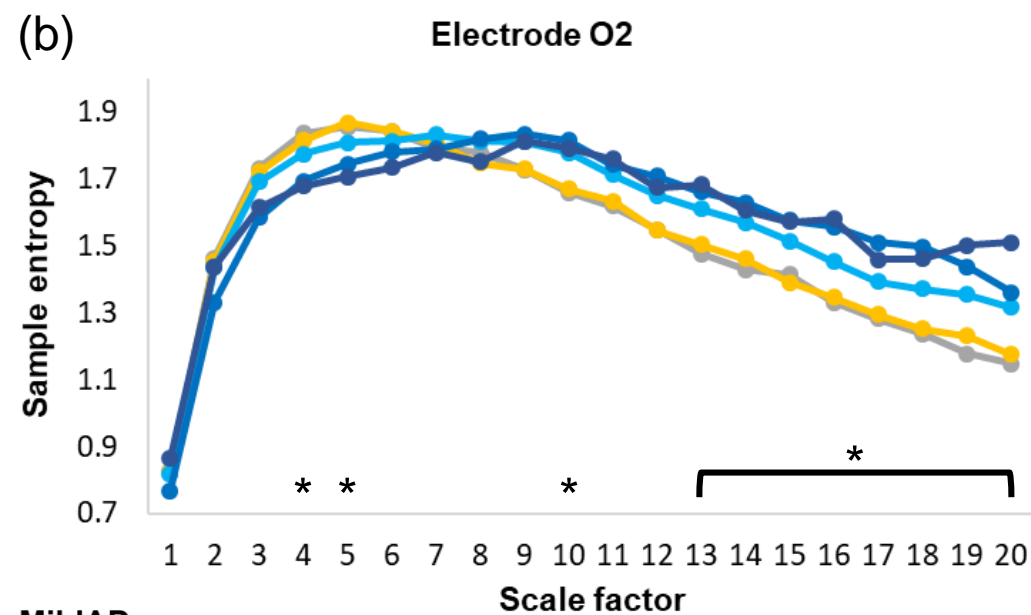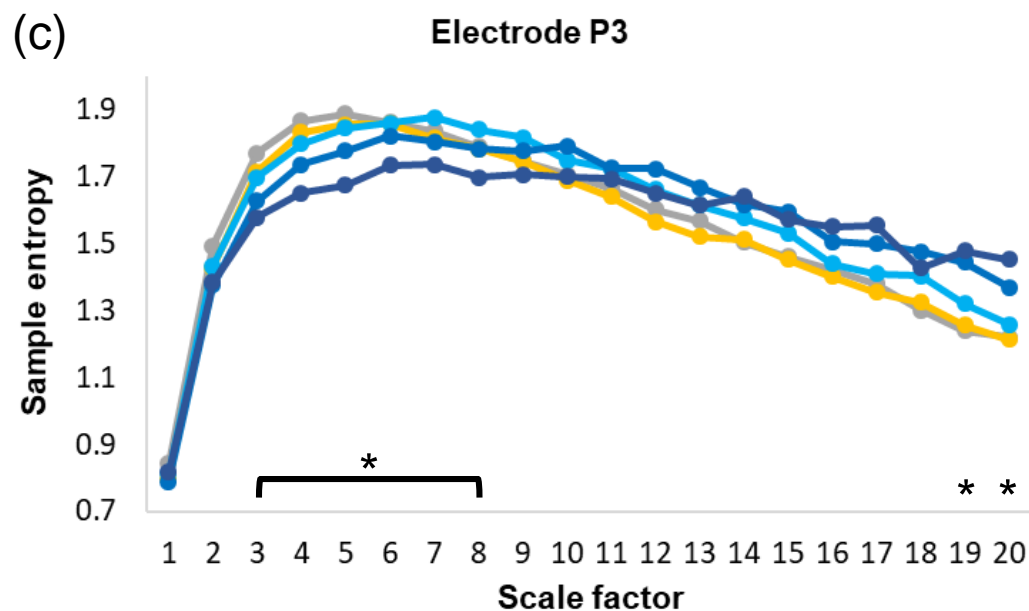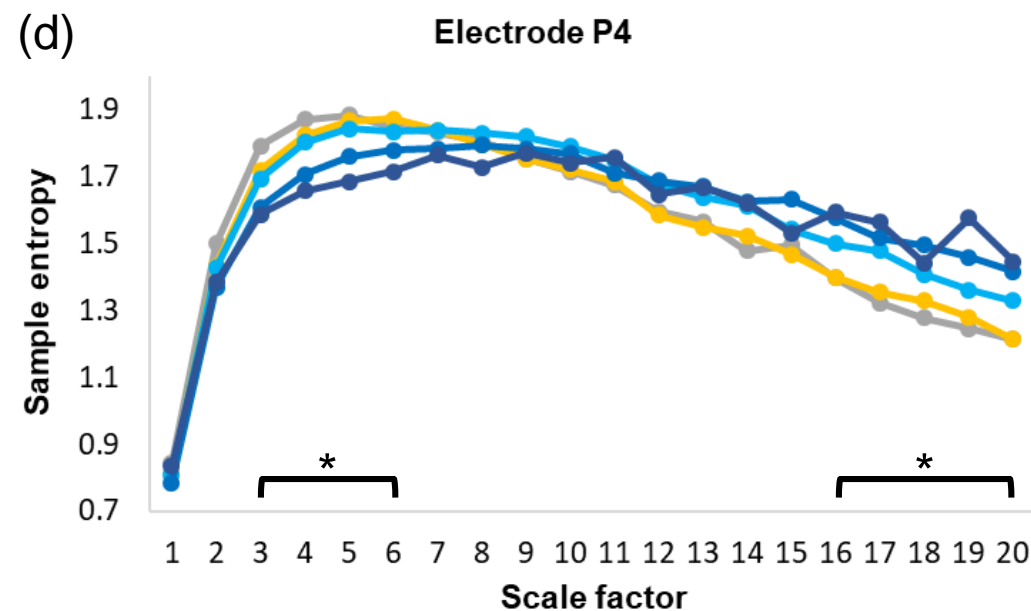

Supplement: s1 [file s1]
